# Supplementary material for: Mutations in Frizzled Class Receptor 4 Associated With Congenital Cavus Foot Deformity
Source: Research Square preprint supplement (doi:10.21203/rs.3.rs-126302/v1), 2021-01-04
Supplement: Supplementary file 4 [file 2fbe6b2f6c56575b2d5d5b9e.xlsx]

## Sheet: Sheet2
Table 1. FZD4 mutation carried by Congenital Cavus Foot Deformity Patients.
Gene ID	Chrs	Position	Gene Region	Function	Predicted Protein Variants	SNP ID	Freq_Alt (1000g)	esp6500	gnomAD	SIFT Score	SIFT Score Pred	MutationTaster	MutationTaster Pred
FZD4	11	86662209	exonic	nonsynonymous SNV	FZD4:NM_012193:exon2:c.1589G>A:p.G530E	rs201256460	0.000998403	0	9.56e-05	0.013	D	1	D
FZD4	11	86665923	exonic	nonsynonymous SNV	FZD4:NM_012193:exon1:c.C205T:p.H69Y	rs80358282	0.000199681	0.0002	0.0005	0.007	D	1	A
